# Supplementary material for: Characterization of two novel Negevirus strains and analysis of global Negevirus distribution and host diversity
Source: Research Square preprint supplement (doi:10.21203/rs.3.rs-6970905/v1), 2025-07-01
Supplement: Supplementary file 1 [file 3f7853af4920739cb94855e9.docx]

**Supplementary materials**

**Supplementary Table 1. Primers employed for virus detection**

| Primer Name | Target Virus | Sequence (5′→3′) | Amplicon Size (bp) |
| --- | --- | --- | --- |
| DEZV-L | Dezidougou virus | AGACCGTTGCTGCGTATCAA | 513 bp |
| DEZV-R | CGAATGGCTCGCTACGTACT |
| PCSV-L | Pyongtaek Culex Solemovirus | AGAGGGCAAAAGCTGAGACC | 596 bp |
| PCSV-R | GTGGACCTCCTTGACTCTGC |
| YSBV-L | Yongsan bunya-like virus | GCAACCCCAACATTGACCAC | 523 bp |
| YSBV-R | TCCTCCTGCTGGGATAAGCT |
| YSSV-L | Yongsan sobemo-like virus 1 | GCTTTTAGCTGGTCGGGCTA | 560bp |
| YSSV-R | TGGCCATAGGTTTTCCGCAT |

**Supplementary Table 2. Overlapping primers designed for DEZV**

| Primer Name | Sequence (5′→3′) |
| --- | --- |
| DEZV_1_LEFT | GAGTCTTATTAAGCTGCAACCCCT |
| DEZV_1_RIGHT | TGGCTTTGATGAAACAATGTTCCG |
| DEZV_2_LEFT | GCACTCTTGACCGCTACATCAA |
| DEZV_2_RIGHT | CCTCGGGGAGACTTTGTAAATAATAATAC |
| DEZV_3_LEFT | CAGTTTGCAAAATGACCCCAGC |
| DEZV_3_RIGHT | CGTCGGCATCAACTCGAGTAAT |
| DEZV_4_LEFT | AAGCGATGAACACGACTCTTCC |
| DEZV_4_RIGHT | CGAACCAGGGGCACAAGATAAT |
| DEZV_5_LEFT | AGTCCATTTGTTTGTCGATCTGCT |
| DEZV_5_RIGHT | CCAGGATGAATGGATGCAGGTT |
| DEZV_6_LEFT | CCCGTCTCTTATTACAATTATCCTGTTC |
| DEZV_6_RIGHT | AGTTATTAGAATTCGAAGCACGCAG |
| DEZV_7_LEFT | CGAACTACACAGACTGCGCTTA |
| DEZV_7_RIGHT | AGCTAATACTTGGGCCACATGC |
| DEZV_8_LEFT | TGACGTAAAATGTTACCGTACCGT |
| DEZV_8_RIGHT | ACAAGATAACGCATGTTTAATAACTCGA |
| DEZV_9_LEFT | TTGTGTGTCACAGCACTCACTC |
| DEZV_9_RIGHT | CCATAAAGGGGAAAAAGACACATCT |
| DEZV_10_LEFT | TGAGTCATCTATTCCCTAACTCTGTG |
| DEZV_10_RIGHT | CTCTCCATATTTCATAACATTCTTCTCCG |
| DEZV_11_LEFT | GTTGAAATGGCTCAAGATCGTCTC |
| DEZV_11_RIGHT | CGAATAGCGGCAGAGATCATATCT |
| DEZV_12_LEFT | ACTGATCAAACTAGGTCGAGCTG |
| DEZV_12_RIGHT | GAAGATTTCACACGATCACAAACAGT |

**Supplementary Table 3. Overlapping primers designed for NEGLV**

| Primer Name | Sequence (5′→3′) |
| --- | --- |
| NEGLV_1_LEFT | CAAACCCTAACCCGGTCAAAGT |
| NEGLV_1_RIGHT | AAAGATGCAGATTCAGGCAGGG |
| NEGLV_2_LEFT | CATATTGCCACACTTGCATGCC |
| NEGLV_2_RIGHT | CAGACAGCGAGCATTTTGAGTTC |
| NEGLV_3_LEFT | CTCCCTGATTCTAAGTTCACGGTC |
| NEGLV_3_RIGHT | TGCAGACACCTTGTTGGAGTTC |
| NEGLV_4_LEFT | TACGTGATGTCGTTTCTCAGCG |
| NEGLV_4_RIGHT | TTCAATGTTGAACGGCATCTGATC |
| NEGLV_5_LEFT | CGACAACAATCACGACTTCCCA |
| NEGLV_5_RIGHT | TTGGGTGGATTGGATGATTTCTGT |
| NEGLV_6_LEFT | ATCGACTGAACCTGACGGTACT |
| NEGLV_6_RIGHT | GAGCAGTTTGACTTCAGTGGCA |
| NEGLV_7_LEFT | CTCTCGCCAGTTTCATCGTCAA |
| NEGLV_7_RIGHT | AGACAACGTAGACATCGAAGCG |
| NEGLV_8_LEFT | CGCTTGTACTTCGTCCCTCAAT |
| NEGLV_8_RIGHT | AAGTCAGGTACGATCATAGGCCT |
| NEGLV_9_LEFT | GCACTGCTACAGTTTCACCTCA |
| NEGLV_9_RIGHT | GGTCGTGTCTACCCAATTTGGT |
| NEGLV_10_LEFT | CGGACTGAAGTTCAACCTCGAA |
| NEGLV_10_RIGHT | GTTCATCACAGATACGCGGAAC |
| NEGLV_11_LEFT | CTTCGCGAACCCATTTCACTCT |
| NEGLV_11_RIGHT | CTTGCCTGCAGATCGTTTGTTG |
| NEGLV_12_LEFT | TATCTTTGGCCGTCCTCATTGC |
| NEGLV_12_RIGHT | ATCGCAGCGATGCTCAGAAG |

**Supplementary Table 4. Primers for T7 transcription and qRT-PCR primers of DEZV and NEGLV**

| Primer Name | Sequence (5′→3′) |
| --- | --- |
| DEZV-qP-T7-Left | TAATACGACTCACTATAGGTCTCAGCCGTACCCGAAAA |
| DEZV-qP-T7-Right | TGATCAACCTCAAGTGCTCGA |
| DEZV-qP-Left | GCCCTGTCAACGAAAAACCC |
| DEZV-qP-Right | GTAGAGGCGACGGTACATGG |
| NEGLV-qP-T7-Left | TAATACGACTCACTATAGGCTCCTACCTTAAGCCGACA |
| NEGLV-qP-T7-Right | GTAGGCGTCACCACCAGTTT |
| NEGLV-qP-Left | ACACAACTATTGCCCGCTGA |
| NEGLV-qP-Right | GCAACTAGTTTAGCGAGCGC |

**Supplementary Table 5. TCID50 assay of DEZV**

| Viral Dilution  Gradient | CPE-Positive  Well Count | CPE- Negative  Well Count | Incidence of CPE |
| --- | --- | --- | --- |
| 10-1 | 8 | 0 | 100% |
| 10-2 | 8 | 0 | 100% |
| 10-3 | 8 | 0 | 100% |
| 10-4 | 8 | 0 | 100% |
| 10-5 | 8 | 0 | 100% |
| 10-6 | 8 | 0 | 100% |
| 10-7 | 8 | 0 | 100% |
| 10-8 | 3 | 5 | 37.5% |
| 10-9 | 0 | 8 | 0 |
| 10-10 | 0 | 8 | 0 |
| 10-11 | 0 | 8 | 0 |
| Negative control | 0 | 8 | 0 |
